# Supplementary material for: Mitochondria-targeted Triphenylamine Derivatives Activatable by Two-Photon Excitation for Triggering and Imaging Cell Apoptosis
Source: PubMed Central journal article supplement (PMC4780088; doi:10.1038/srep21458), 2016-03-07
Supplement: srep21458-s1.pdf [file srep21458-s1.pdf]

## SUPPORTING INFORMATION

### Mitochondria-targeted Triphenylamine Derivatives Activatable by Two-Photon Excitation for Triggering and Imaging Cell Apoptosis

Rahima Chennoufi<sup>1</sup>, Houcine Bougherara<sup>1</sup>, Nathalie Gagey-Eilstein<sup>1,3</sup>, Blaise Dumat<sup>2</sup>, Etienne Henry<sup>1,4</sup>, Frédéric Subra<sup>1</sup>, Stéphanie Bury-Moné<sup>1</sup>, Florence Mahuteau-Betzer<sup>2</sup>, Patrick Tauc<sup>1</sup>, Marie-Paule Teulade-Fichou<sup>2\*</sup> and Eric Deprez<sup>1\*</sup>

<sup>1</sup>Laboratory of Biology and Applied Pharmacology, ENS Cachan, CNRS UMR8113, IDA FR3242, F-94235 Cachan, France

<sup>2</sup>Laboratory of Chemistry, CNRS UMR176, Institut Curie, University of Orsay, Paris-Sud, 91405 Orsay, France

<sup>3</sup>Present address: CNRS UMR8638, University of Paris-Descartes, 75006 Paris, France

<sup>4</sup>Present address: CNRS UMR6197 / UBO / IFREMER, 29280 Plouzane, France

\* corresponding authors:

E-mail: [deprez@lbpa.ens-cachan.fr](mailto:deprez@lbpa.ens-cachan.fr); [mp.teulade-fichou@curie.fr](mailto:mp.teulade-fichou@curie.fr)

#### Table of contents:

|                   |        |
|-------------------|--------|
| - Figure S1a..... | page 2 |
| - Figure S1b..... | page 3 |
| - Table S1.....   | page 4 |
| - Table S2.....   | page 4 |

**a**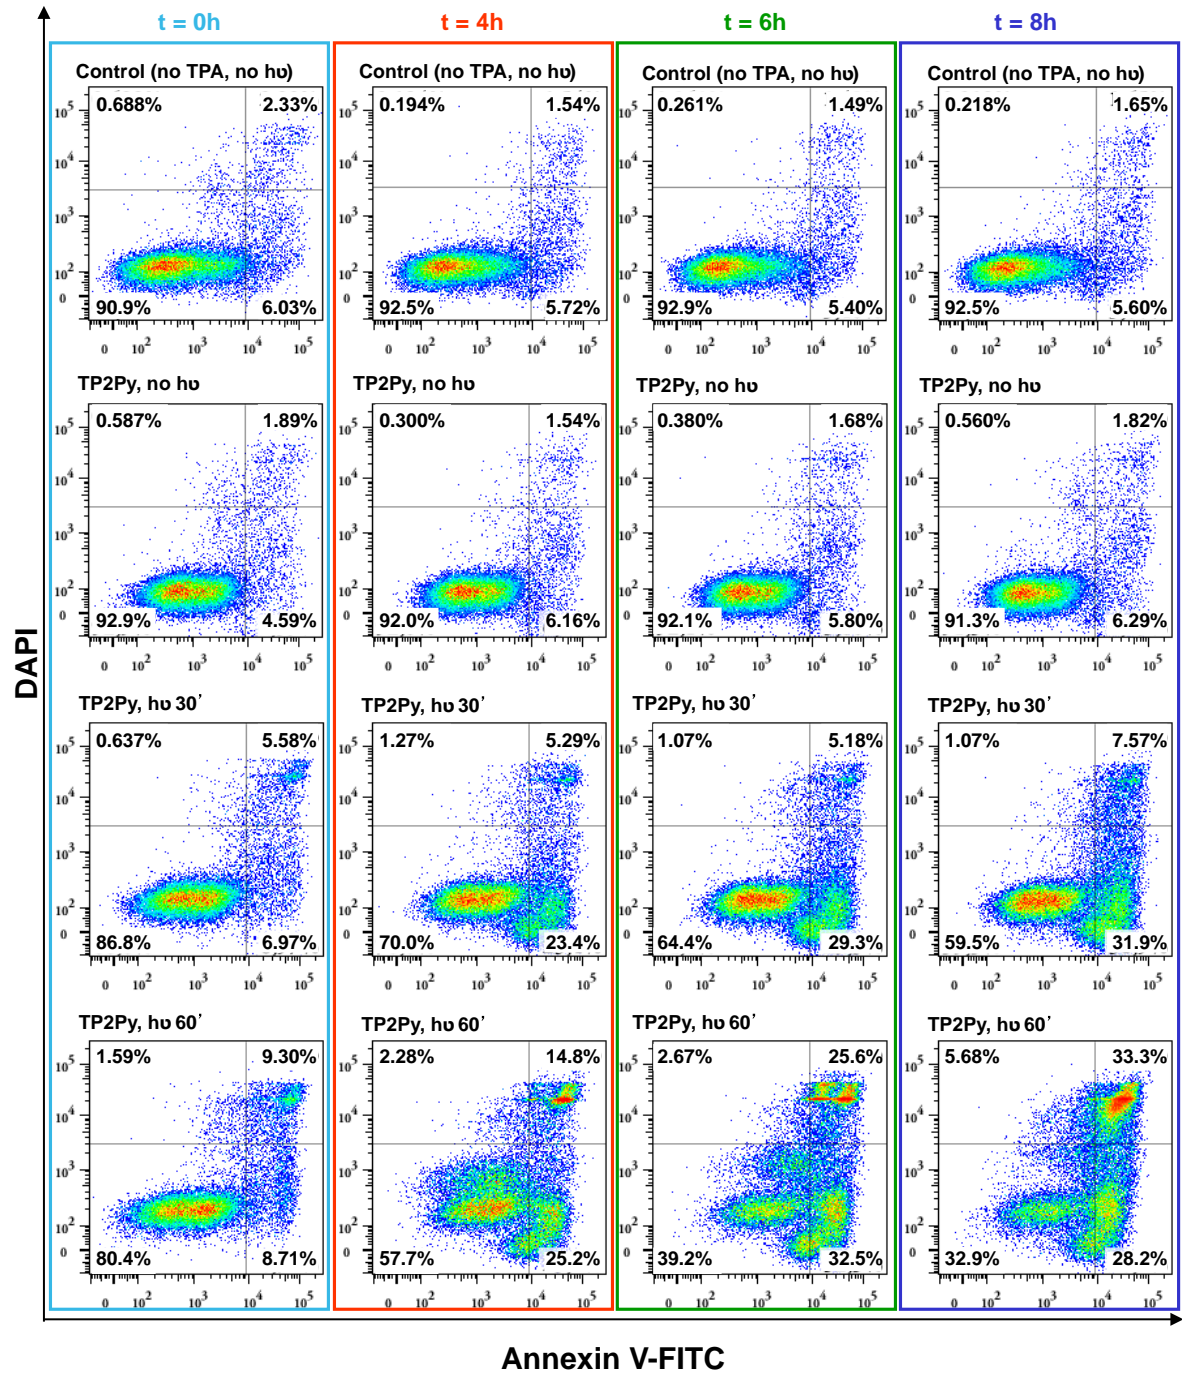

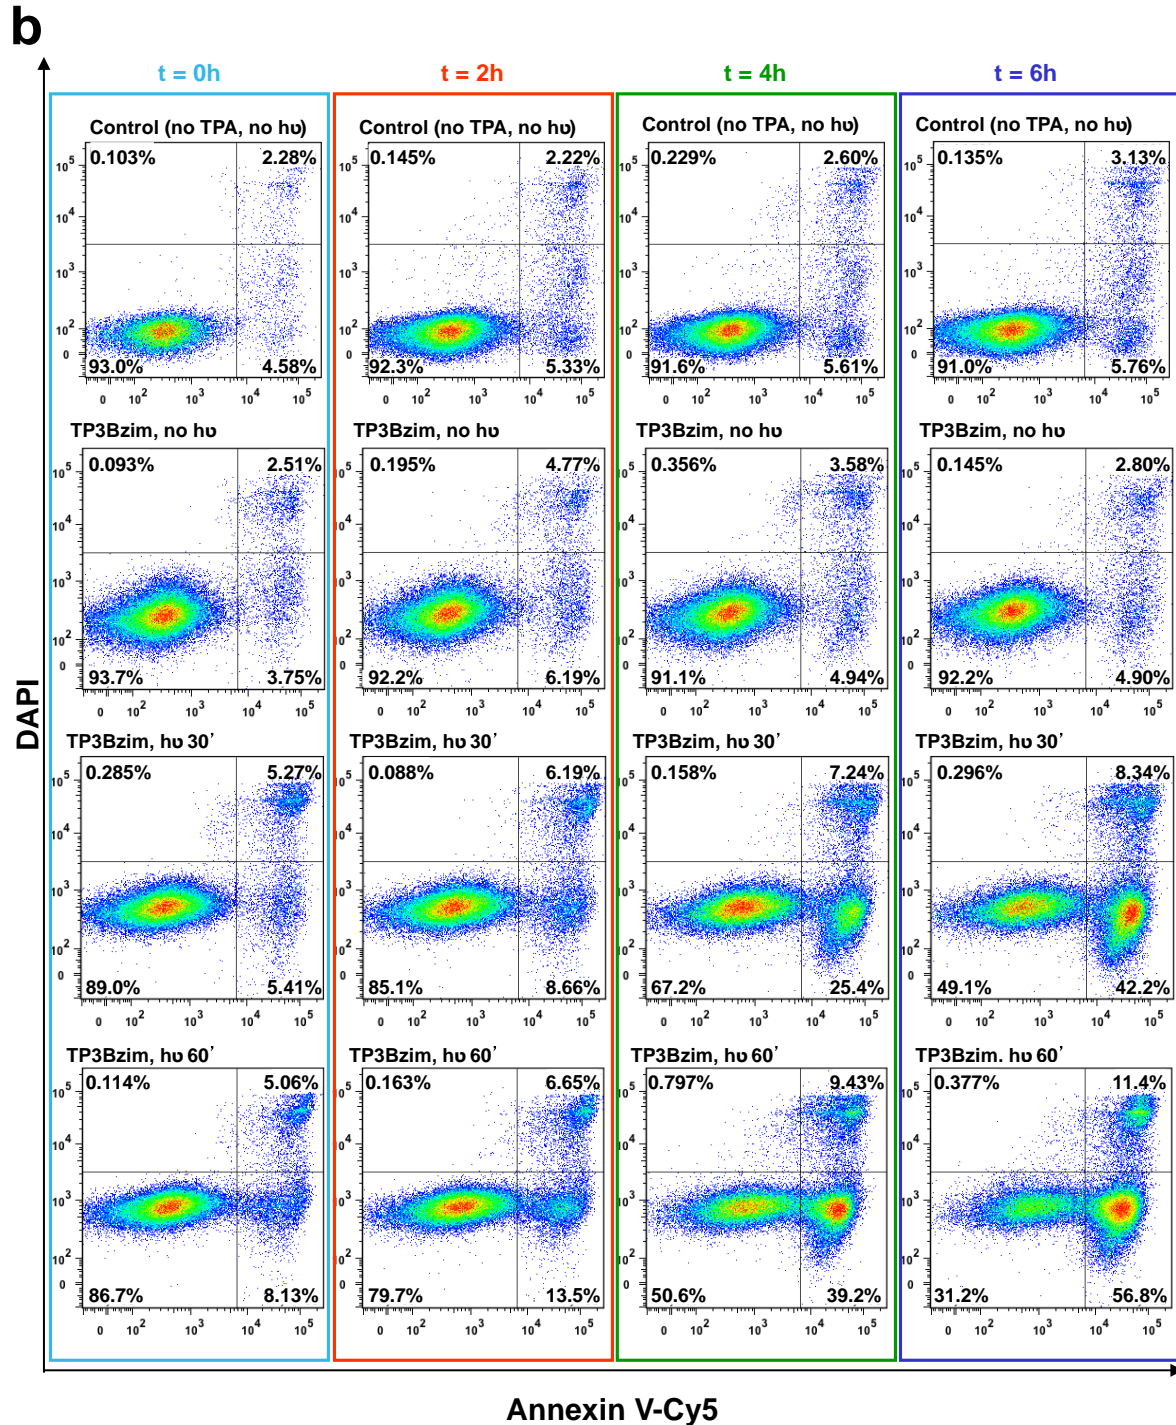

**Figure S1.** Flow cytometric analysis of Annexin V/DAPI staining of TPA-treated Jurkat cells. Jurkat cells were pre-incubated with 2  $\mu$ M TP2Py (a) or TP3Bzim (b) for 2h in the dark at 37°C and subjected to light illumination for either 30 min (3<sup>rd</sup> line) or 60 min (4<sup>th</sup> line) at 452 nm (17 mW/cm<sup>2</sup>). After light exposure, cells were either immediately (t=0; light blue) treated for Annexin V/DAPI staining or further incubated for various times in the dark at 37°C before Annexin V/DAPI treatment: a, t = 4h (red); t = 6h (green); t = 8h (dark blue); b, t = 2h (red); t = 4h (green); t = 6h (dark blue). 1<sup>st</sup> line: untreated control cells (without TPA, without light illumination). 2<sup>nd</sup> line: TPA-treated control cells (without light illumination). Annexin V was labelled with FITC (panel a) or Cy5 (panel b). The horizontal and vertical axes correspond to fluorescence intensities of Annexin V-FITC/Cy5 and DAPI, respectively. The 2-D dot plots shown in panels a & b are representative of three independent experiments.

**Table S1:** Times of illumination required for the observation of cellular events upon two-photon excitation of TP3Bzim at various wavelengths.

| <b>Two-photon excitation of TP3Bzim<sup>a</sup></b> |               |               |               |               |               |
|-----------------------------------------------------|---------------|---------------|---------------|---------------|---------------|
|                                                     | <b>740 nm</b> | <b>760 nm</b> | <b>780 nm</b> | <b>800 nm</b> | <b>820 nm</b> |
| Appearance of blebs                                 | 3 min         | 2.5 min       | 3 min         | 5 min         | 10 min        |
| Beginning of the nuclear translocation              | 6 min         | 6 min         | 6 min         | 6 min         | 13 min        |
| Nuclear staining (max)                              | 18 min        | 9 min         | 13 min        | 11 min        | 21 min        |

<sup>a</sup>Irradiance: 1.25 W/cm<sup>2</sup>

**Table S2:** Times of illumination required for the observation of cellular events upon two-photon excitation of TP2Py at various wavelengths.

| <b>Two-photon excitation of TP2Py<sup>a</sup></b> |               |               |               |                 |
|---------------------------------------------------|---------------|---------------|---------------|-----------------|
|                                                   | <b>840 nm</b> | <b>860 nm</b> | <b>880 nm</b> | <b>900 nm</b>   |
| Appearance of blebs                               | 19.5 min      | 10 min        | 9 min         | nd <sup>b</sup> |
| Beginning of the nuclear translocation            | 21 min        | 10 min        | 12 min        | nd <sup>b</sup> |
| Nuclear staining (max)                            | 34.5 min      | 20 min        | 24 min        | nd <sup>b</sup> |

<sup>a</sup>Irradiance: 1.25 W/cm<sup>2</sup>. <sup>b</sup>nd: not determined due to photobleaching
